# Supplementary material for: The natural history of 21-hydroxylase autoantibodies in autoimmune Addison’s disease
Source: PubMed Central journal article supplement (PMC8052519; doi:10.1530/eje-20-1268), 2021-01-29

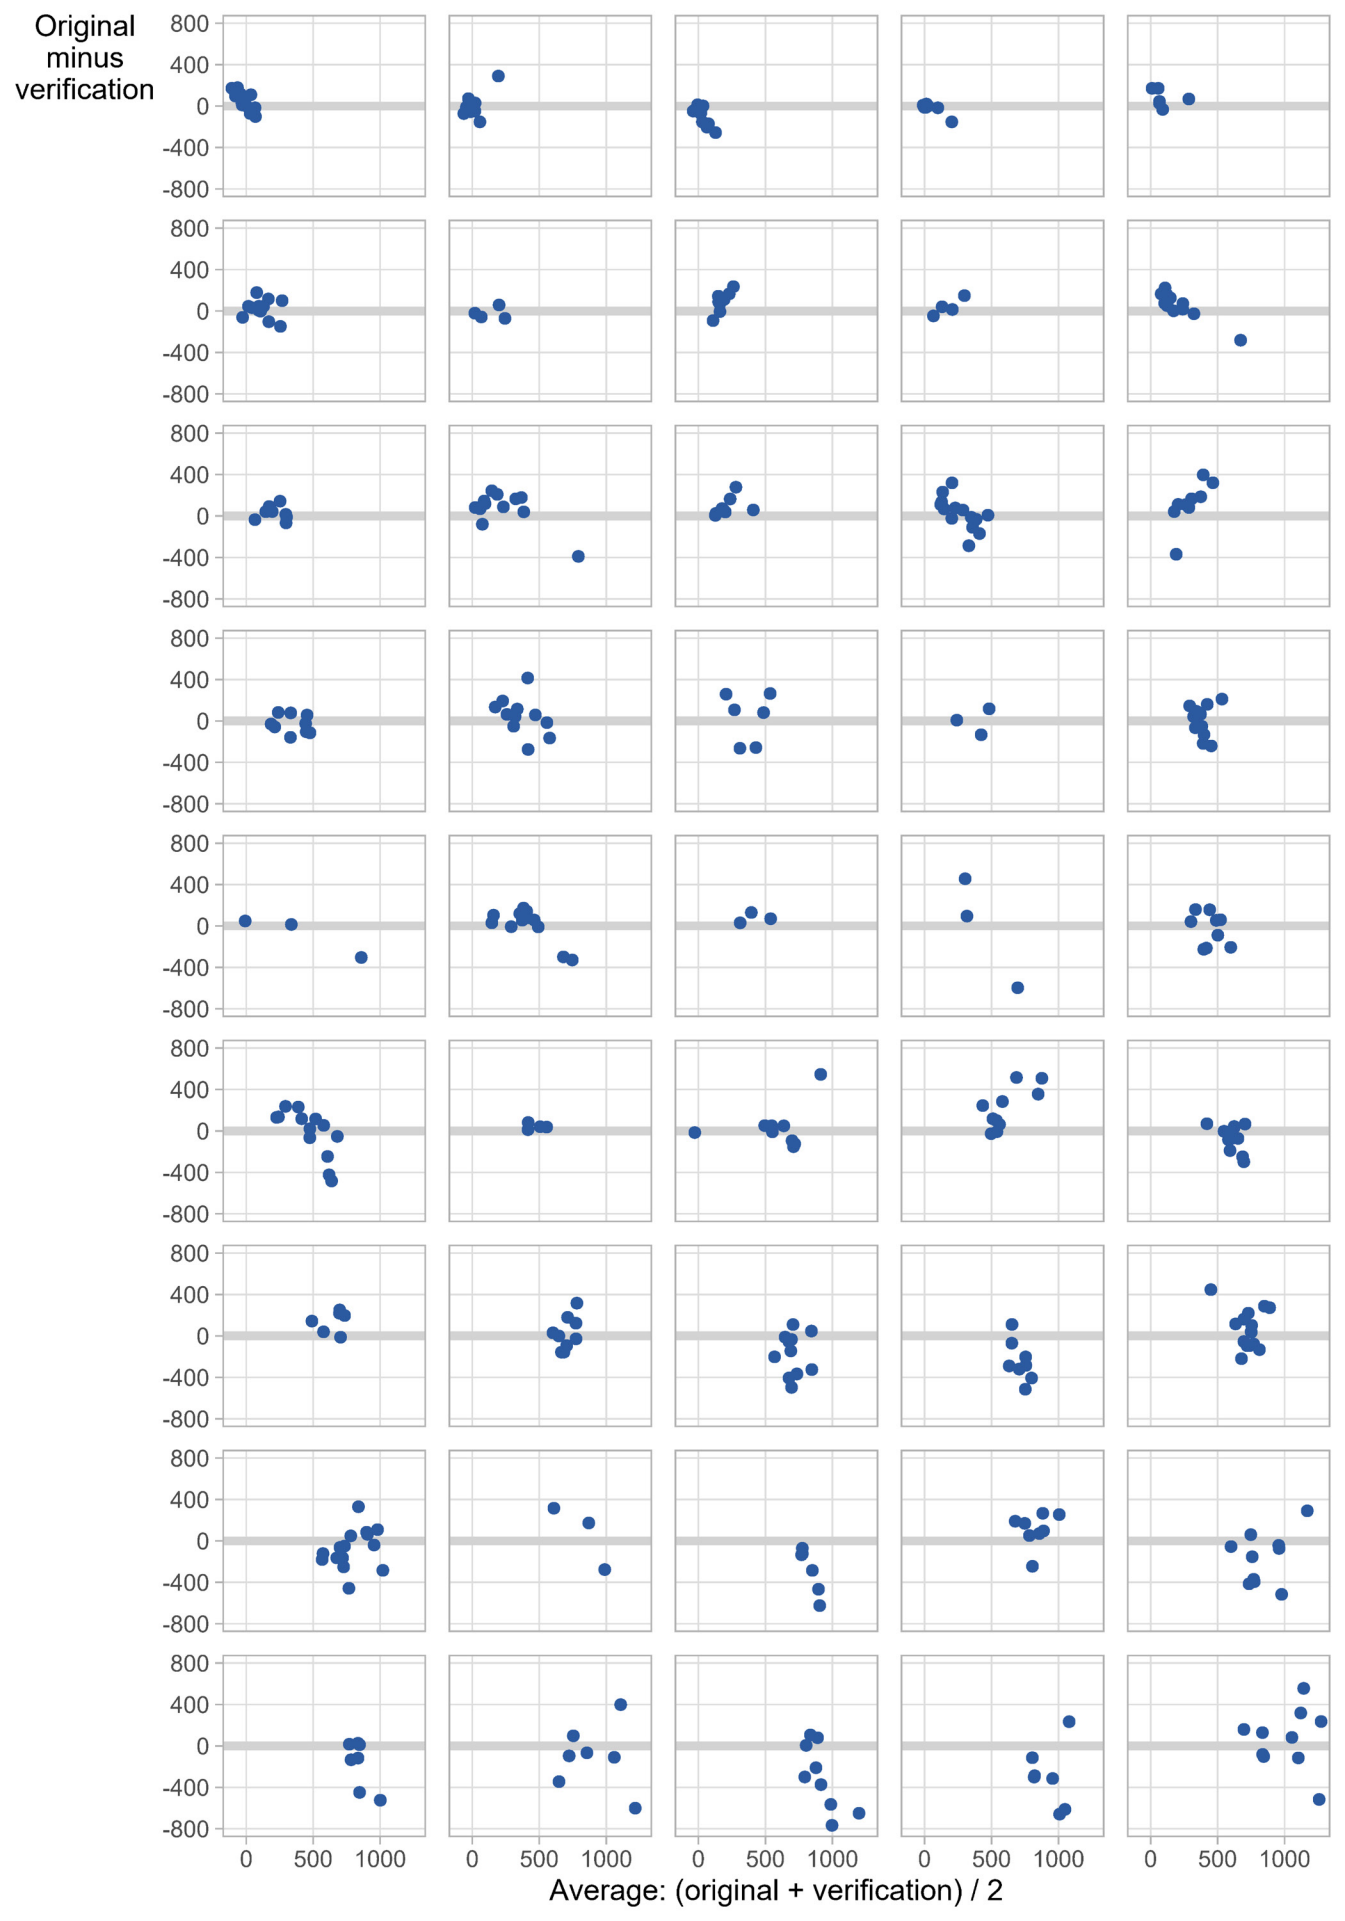

Supplement: supplementary_figure_2.pdf [file supplementary_figure_2.pdf]
